# Supplementary material
Source: MDPI journal article supplement (https://www.mdpi.com/2071-1050/11/12/3308)
Supplement: s1 [file s1]

## Section One: Your Experience with Community Gardens

Please fill out the following survey questions to the best of your ability. Indicate your response by circling the letter that corresponds to your answer. (Here we refer to participation BEYOND maintenance of your personal plot, i.e., garden service hours)

1. Which garden do you belong to?

- a. Sunshine Community Garden
- b. Festival Beach Community Garden
- c. Adelphi Acre Community Garden

2. How long have you been gardening in this garden?

- a. Less than a month
- b. 1 month to 6 months
- c. 7 months to 1 year
- d. 1 to 5 years
- e. More than 6 years

3. How long have you been gardening overall?

- a. Less than a month
- b. 1 month to 6 months
- c. 7 months to 1 year
- d. 1 to 5 years
- e. More than 5 years

4. **How many times** did you participate in this community garden **last month**? (Include your service hours)

- a. Not at all
- b. 1-2 times
- c. 3-4 times
- d. 5-6 times
- e. 7-8 times
- f. More than 9 times

5. **How many hours** did you work at the garden **last week**? (Include your service hours)

- a. Not at all
- b. 1-2 hours
- c. 3-5 hours
- d. 6-9 hours
- e. More than 10 hours

6. How many minutes does it usually take you to get to or from the garden?

\_\_\_\_\_minutes

7. Do you usually travel between your home and the garden directly, or to/from some other place such as work or school?

a. Between home and the garden

b. From some other place

8. How do you feel about this garden (Please select the circle that best explains how much you agree or disagree with **each** statement)

|                                                                                    | <u>Strongl<br/>y<br/>disagree</u> | <u>Somew<br/>hat<br/>disagree</u> | <u>Neither<br/>agree<br/>nor<br/>disagree</u> | <u>Somew<br/>hat<br/>agree</u> | <u>Strongl<br/>y agree</u> |
|------------------------------------------------------------------------------------|-----------------------------------|-----------------------------------|-----------------------------------------------|--------------------------------|----------------------------|
| a. This garden means a lot to me                                                   | 1                                 | 2                                 | 3                                             | 4                              | 5                          |
| b. I am very attached to this garden                                               | 1                                 | 2                                 | 3                                             | 4                              | 5                          |
| c. I strongly identify with this garden                                            | 1                                 | 2                                 | 3                                             | 4                              | 5                          |
| d. I have special connections to this garden and the people who visit it           | 1                                 | 2                                 | 3                                             | 4                              | 5                          |
| e. I enjoy visiting this garden more than any other gardens                        | 1                                 | 2                                 | 3                                             | 4                              | 5                          |
| f. I get more satisfaction out of visiting this garden than from any other garden  | 1                                 | 2                                 | 3                                             | 4                              | 5                          |
| g. Visiting this garden is more important than visiting any other gardens          | 1                                 | 2                                 | 3                                             | 4                              | 5                          |
| h. I would not substitute activities at other gardens for the activities I do here | 1                                 | 2                                 | 3                                             | 4                              | 5                          |

### Section Two: Attitudes about Gardening

Please answer each of the following questions by circling the number that best describes your opinion. Some of the questions may appear to be similar, but they do address somewhat different issues. Please read each question carefully.

9. For me, participating in gardening is ...”

Extremely boring      1      2      3      4      5      Extremely interesting

Extremely harmful      1          2          3          4          5          Extremely beneficial

Extremely  
worthless                      1          2          3          4          5          Extremely valuable

10. For me, how important is \_\_\_\_\_ by participating in this garden to you?

|                                       | Extremely unimportant |   |   |   | Extremely important |
|---------------------------------------|-----------------------|---|---|---|---------------------|
| a. accessing fresh food               | 1                     | 2 | 3 | 4 | 5                   |
| b. enjoying being outdoors            | 1                     | 2 | 3 | 4 | 5                   |
| c. enhancing bodily health            | 1                     | 2 | 3 | 4 | 5                   |
| d. improving psychological well-being | 1                     | 2 | 3 | 4 | 5                   |
| e. socializing with other gardeners   | 1                     | 2 | 3 | 4 | 5                   |
| f. participating in social activities | 1                     | 2 | 3 | 4 | 5                   |
| g. connecting with nature             | 1                     | 2 | 3 | 4 | 5                   |

11. Most people who are important to me \_\_\_\_\_ me to participate in this garden.

Discourage                      1          2          3          4          5          encourage

12. The people in my life whose opinions I value \_\_\_\_\_ of me participating in this garden.

Disapprove                      1          2          3          4          5          Approve

13. Please answer each question as honestly as possible.

|                                                                                                           | Extremely unlikely |   |   |   | Extremely likely |
|-----------------------------------------------------------------------------------------------------------|--------------------|---|---|---|------------------|
| a. If I spend too much time in this community garden, my family members discourage me from participating. | 1                  | 2 | 3 | 4 | 5                |

b. If I routinely fail to participate in this community garden, I feel pressure from my neighboring gardeners.      1      2      3      4      5

c. If my plot(s) are poorly maintained, I feel pressure from the garden managers.      1      2      3      4      5

14. For me, to participate in gardening is.

Very difficult      1      2      3      4      5      Very easy

15. Whether or not I participate in gardening is entirely up to me.

Strongly disagree      1      2      3      4      5      Strongly agree

16. How much personal control do you feel you have over participating in gardening.

Very little control      1      2      3      4      5      Complete control

17. How often do you feel that \_\_\_\_\_ make(s) participation in your community garden difficult?

Never

Frequently

a. lack of time      1      2      3      4      5

b. distance from a garden      1      2      3      4      5

c. the difficulty of managing pests and invasives      1      2      3      4      5

d. lack of gardening skills      1      2      3      4      5

e. large plot to maintain      1      2      3      4      5

f. service hours requirements      1      2      3      4      5

18. Please answer each question as honestly as possible.

|                                                                   | Strongly disagree |   |   |   | Strongly agree |
|-------------------------------------------------------------------|-------------------|---|---|---|----------------|
| a. I intend to keep participating in this community garden.       | 1                 | 2 | 3 | 4 | 5              |
| b. I have decided to keep participating in this community garden. | 1                 | 2 | 3 | 4 | 5              |
| c. I expect to keep participating in this community garden.       | 1                 | 2 | 3 | 4 | 5              |

### Section Three: Personal Characteristics

19. What is your gender?

a. Male

b. Female

20. What is your age?

a. 19-29

d. 50-59

b. 30-39

e. 60-69

c. 40-49

f. > 70

21. What is the zip code of your residence? \_\_\_\_\_

22. What is the highest level of education you have completed?

a. Less than a high school degree

e. 4-year College/University Bachelor's degree

b. High school degree or GED

c. Some college

f. Advanced degree (Master's, Ph.D., JD, MD)

d. Trade/technical/vocational training or associate degree

23. What is your race/ethnicity? (Please ✓ check ONE that best applies)

a. Asian

d. White/Anglo

b. Black or African American

e. Other (please specify) \_\_\_\_\_

c. Hispanic or Latino

24. What is your marital status?

a. Single

b. Married/living with partner

- c. Married/not living with partner
- d. Divorced/separated

e. Widower/widow

25. Employment Status: Are you currently...?

- a. Employed for wages
- b. Self-employed
- c. Out of work and looking for work
- d. Out of work but not currently looking for work
- e. A homemaker

- f. A student
- g. Military
- h. Retired
- i. Unable to work
- j. Other (please specify)\_\_\_\_\_

26. Including yourself, how many people are living in your household at present time? \_\_\_\_\_

27. How many children age 5 or younger do you currently have living at home? \_\_\_\_\_

28. How many children age 6 to 18 do you currently have living at home? \_\_\_\_\_

29. What was your total household annual income before taxes for 2015?

- a. Less than \$10,000
- b. \$10,000 to \$14, 999
- c. \$15,000 to \$24,999
- d. \$25,000 to \$34,999
- e. \$35,000 to \$49,999
- f. \$50,000 to \$74,999
- g. \$75,000 to \$99,999
- h. \$100,000 to \$149,999
- i. \$150,000 to \$ 199,999
- j. \$200,000 or more

Here, I would like to leave space for you to add any additional comments related to this survey.

---

---

---

Thank you very much for your participation. I appreciate your assist.
